# Supplementary material
Source: PubMed Central journal article supplement (PMC4851709)

# Supplementary Figure S4

**A**

WT

RNF8<sup>-/-</sup>

cerebral cortex

thalamus

hippocampus

cerebral cortex

thalamus

hippocampus

0Gy

2Gy

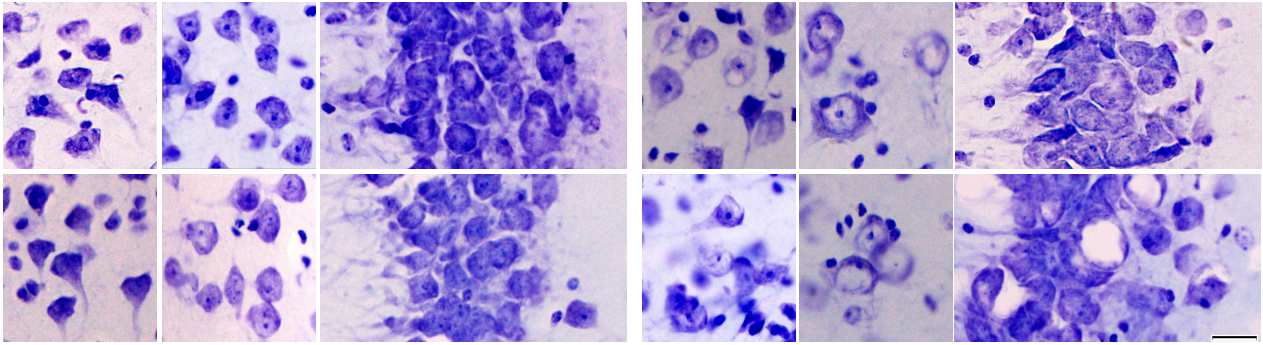

**B**

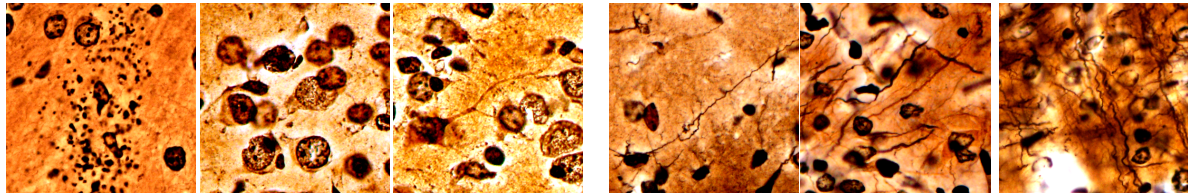

Supplement: NIHMS767752-supplement-4.pdf [file NIHMS767752-supplement-4.pdf]
