# Supplementary material
Source: PubMed Central journal article supplement (PMC4851709)

# Supplementary Figure S1

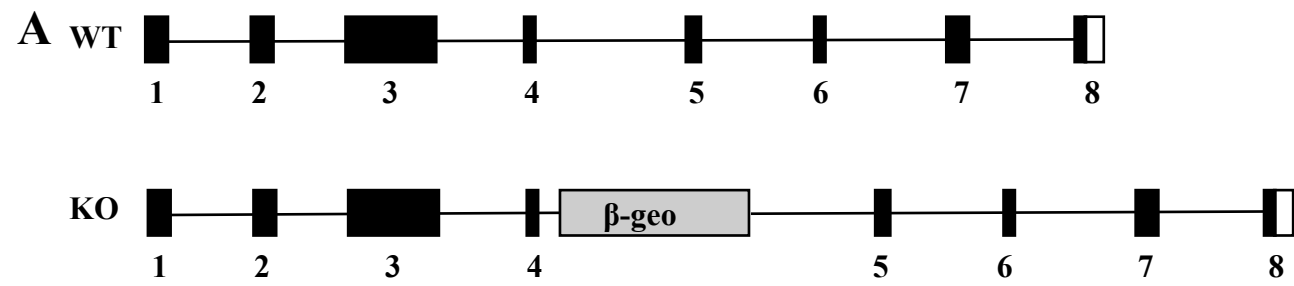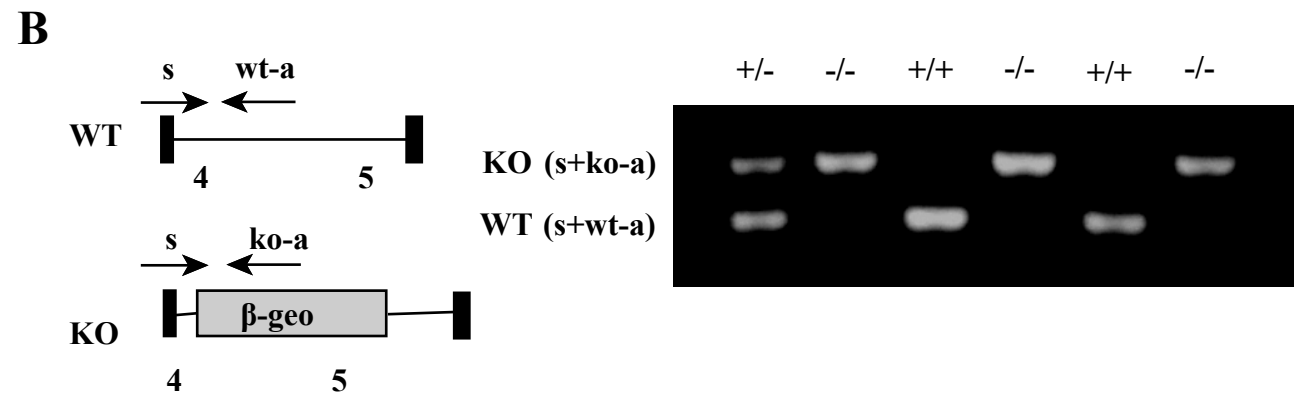

Supplement: NIHMS767752-supplement-1.pdf [file NIHMS767752-supplement-1.pdf]

# Supplementary Figure S2

**A**

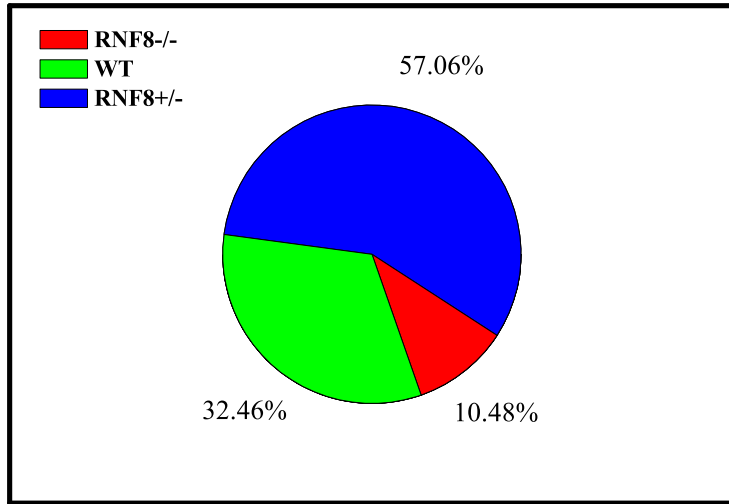

**B**

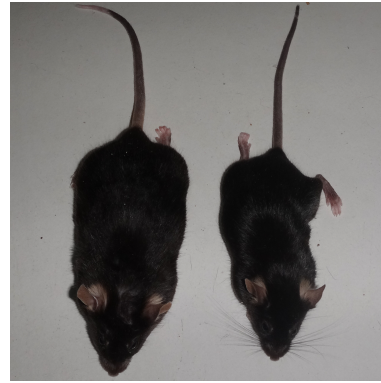

**C**

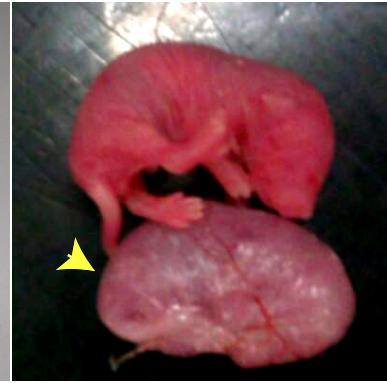

**D**

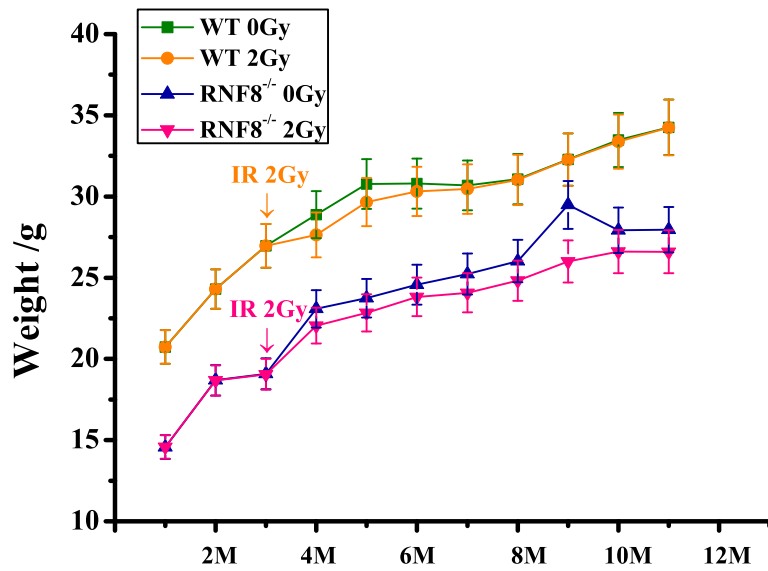

**E**

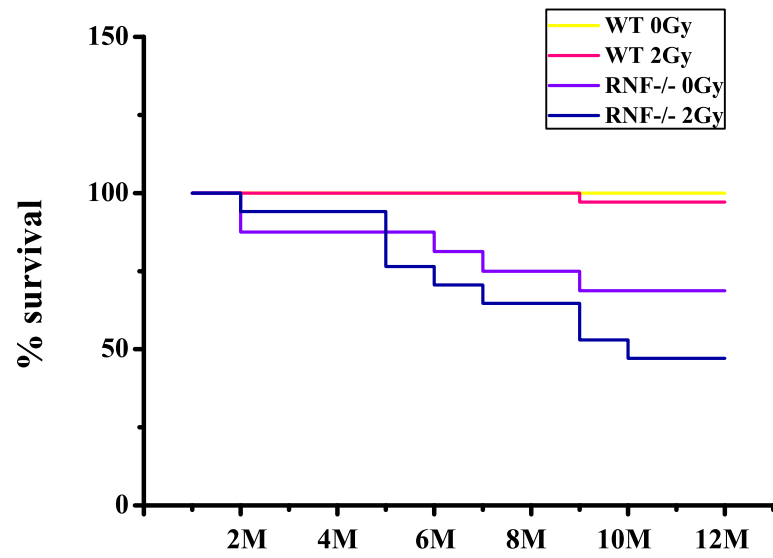

Supplement: NIHMS767752-supplement-2.pdf [file NIHMS767752-supplement-2.pdf]

**Supplementary Figure S3**

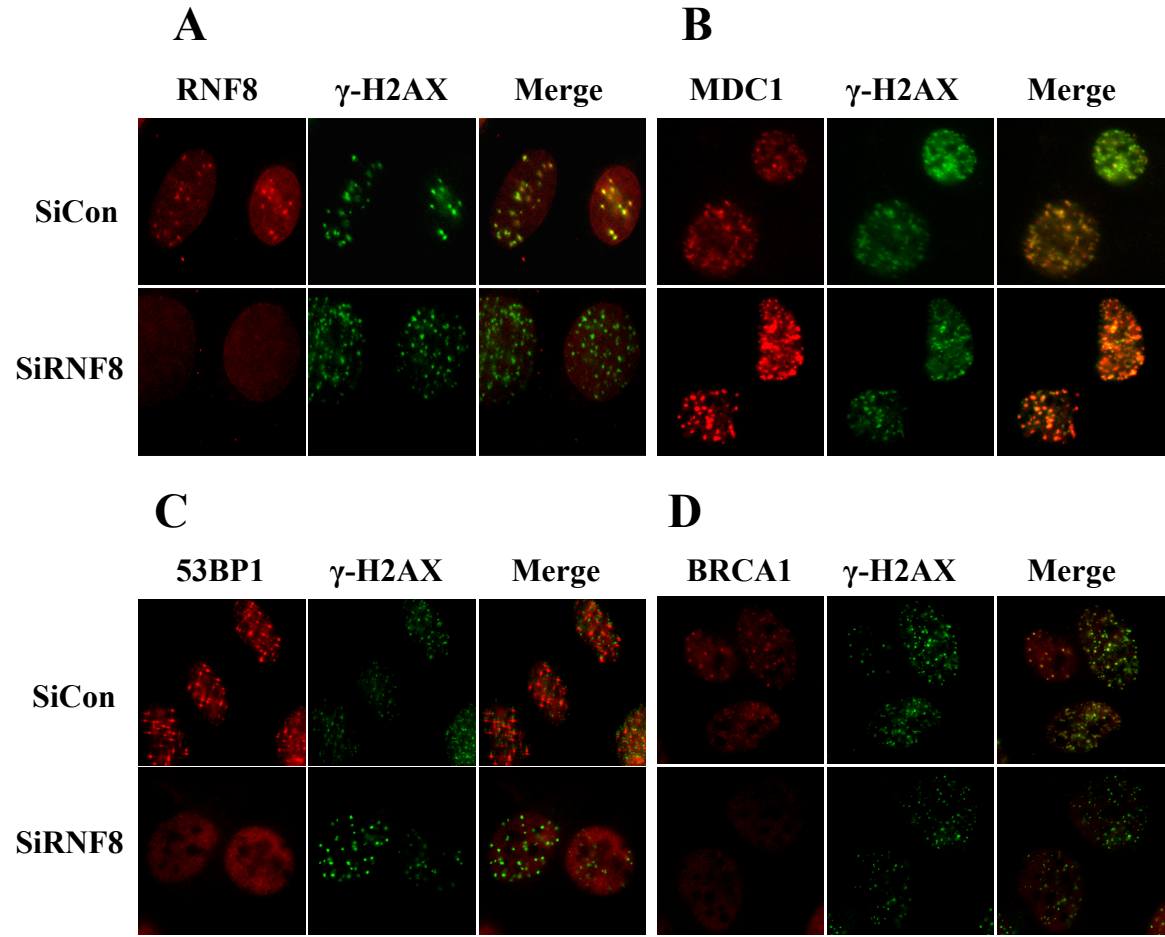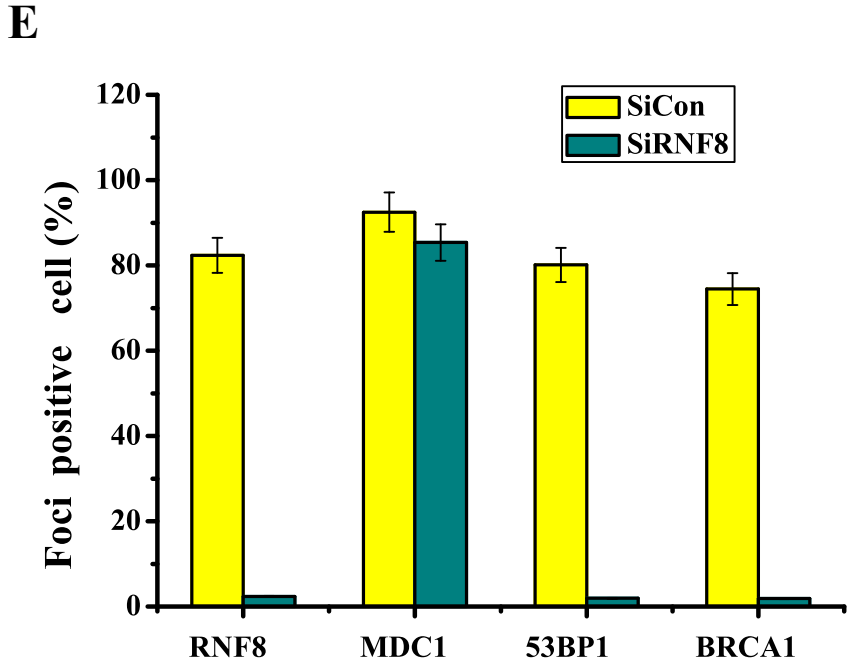

Supplement: NIHMS767752-supplement-3.pdf [file NIHMS767752-supplement-3.pdf]
